# Supplementary material
Source: ML conference proceedings conference paper supplement (https://openreview.net/forum?id=Q3FXnCPZ1X)
Supplement: supplementary_material [file attachment]

---

# Fast and Simple Spectral Clustering in Theory and Practice

## Appendix

---

Anonymous Author(s)

Affiliation

Address

email

### 1 A Omitted detail from Section 3

2 In this section, we prove the main theoretical result of the paper. In order that this section is self-  
3 contained, we repeat some of the steps included in the main paper. We first show that the lengths  
4 of the random vectors  $\mathbf{x}_i$  generated in Algorithm 2 are close to their expected value. Notice that  
5  $\mathbb{E}[\|\mathbf{x}_i\|_2] = \sqrt{n}$  and  $\mathbb{E}[\|\mathbf{P}\mathbf{x}_i\|_2] = \sqrt{k}$ . We use Chebyshev's inequality to show the following.

6 **Lemma A.1.** *Let  $\mathbf{x} \in \mathbb{R}^n$  be drawn from the  $n$ -dimensional Gaussian distribution  $\mathcal{N}(\mathbf{0}, \mathbf{I})$ . Let  
7  $\mathbf{f}_1, \dots, \mathbf{f}_k \in \mathbb{R}^n$  be orthogonal vectors and let  $\mathbf{P} = \sum_{i=1}^k \mathbf{f}_i \mathbf{f}_i^\top$  be the projection onto the space  
8 spanned by  $\mathbf{f}_1, \dots, \mathbf{f}_k$ . With probability at least  $1 - (1/10k)$ ,*

9  $\bullet \|\mathbf{P}\mathbf{x}\|_2 \leq \sqrt{6k}, \text{ and}$

10  $\bullet \|\mathbf{x}\|_2 \leq \sqrt{6n}.$

11 *Proof of Lemma A.1.* Since  $\mathbf{x}$  is drawn from a symmetric  $n$ -dimensional Gaussian distribution,  $\|\mathbf{x}\|_2^2$   
12 is distributed according to a  $\chi^2$  distribution with  $n$  degrees of freedom. Similarly, since  $\mathbf{P}$  is a  
13 projection matrix,  $\|\mathbf{P}\mathbf{x}\|_2^2$  is distributed according to a  $\chi^2$  distribution with  $k$  degrees of freedom. By  
14 the Chebyshev inequality, we have that

$$\Pr\left[\|\mathbf{P}\mathbf{x}_i\|_2^2 \geq 6k\right] \leq \frac{k}{(5k)^2} = \frac{1}{25k},$$

15 and

$$\Pr\left[\|\mathbf{x}_i\|_2^2 \geq 6n\right] \leq \frac{n}{(5n)^2} = \frac{1}{25n}.$$

16 The lemma follows by the union bound and since  $k \leq n$ . ■

17 We now show that the output of the POWERMETHOD algorithm is close to a random vector in the  
18 space spanned by  $\mathbf{f}_1, \dots, \mathbf{f}_k$ .

19 **Lemma 3.1.** *Let  $\mathbf{M} \in \mathbb{R}^{n \times n}$  be a matrix with eigenvalues  $1 \geq \gamma_1 \geq \dots \geq \gamma_n \geq 0$  and  
20 corresponding eigenvectors  $\mathbf{f}_1, \dots, \mathbf{f}_n$ . Let  $\mathbf{x}_0 \in \mathbb{R}^n$  be drawn from the  $n$ -dimensional Gaus-  
21 sian distribution  $\mathcal{N}(\mathbf{0}, \mathbf{I})$ . Let  $\mathbf{x}_t = \text{POWERMETHOD}(\mathbf{M}, \mathbf{x}_0, t)$  for  $t = \Theta(\log(n/\epsilon^2 k))$ . If  
22  $\gamma_k \geq 1 - O(\epsilon \cdot \log(n/\epsilon^2 k)^{-1})$  and  $\gamma_{k+1} \leq 1 - \Omega(1)$ , then with probability at least  $1 - (1/10k)$ ,*

$$\|\mathbf{x}_t - \mathbf{P}\mathbf{x}_0\|_2 \leq \epsilon\sqrt{k},$$

23 where  $\mathbf{P} = \sum_{i=1}^k \mathbf{f}_i \mathbf{f}_i^\top$  is the projection onto the space spanned by the first  $k$  eigenvectors of  $\mathbf{M}$ .

24 *Proof of Lemma 3.1.* By the assumptions of the Lemma, we can assume that

- 25 •  $\gamma_{k+1} \leq c_1 < 1$ ,
- 26 •  $\gamma_k \geq 1 - c_2 \epsilon \log(24n/\epsilon^2 k)^{-1}$ , and
- 27 •  $t = c_3 \log(24n/\epsilon^2 k)$ ,

28 for constants  $c_1, c_2$ , and  $c_3$ . Fixing  $c_1 < 1$ , we will set

$$c_3 = \frac{1}{2 \log\left(\frac{1}{c_1}\right)}$$

29 and

$$c_2 = \frac{1}{c_3 \cdot 2\sqrt{6}}.$$

30 Furthermore, by Lemma A.1, with probability at least  $1 - (1/10k)$  it holds that

$$\|\mathbf{P}\mathbf{x}_0\|_2 \leq \sqrt{6k}$$

31 and

$$\|\mathbf{x}_0\|_2 \leq \sqrt{6n},$$

32 and we assume that this holds in the remainder of the proof.

33 Now, we write  $\mathbf{x}_0$  in terms of its expansion in the basis given by the eigenvectors  $\mathbf{f}_1, \dots, \mathbf{f}_n$ :

$$\mathbf{x}_0 = \sum_{j=1}^n a_j \mathbf{f}_j,$$

34 where  $a_j = \langle \mathbf{x}_0, \mathbf{f}_j \rangle$ . Similarly, we have

$$\mathbf{P}\mathbf{x}_0 = \sum_{j=1}^k a_j \mathbf{f}_j$$

35 and

$$\mathbf{x}_t = \sum_{j=1}^n a_j \gamma_j^t \mathbf{f}_j.$$

36 Then,

$$\begin{aligned} \|\mathbf{y}_i - \mathbf{P}\mathbf{x}_0\|_2 &= \left\| \sum_{j=1}^k (a_j \gamma_j^t - a_j) \mathbf{f}_j + \sum_{j=k+1}^n a_j \gamma_j^t \mathbf{f}_j \right\|_2 \\ &\leq \left\| \sum_{j=1}^k (a_j \gamma_j^t - a_j) \mathbf{f}_j \right\|_2 + \left\| \sum_{j=k+1}^n a_j \gamma_j^t \mathbf{f}_j \right\|_2 \\ &\leq \left\| (1 - \gamma_k^t) \sum_{j=1}^k a_j \mathbf{f}_j \right\|_2 + \left\| \gamma_{k+1}^t \sum_{j=k+1}^n a_j \mathbf{f}_j \right\|_2 \\ &= (1 - \gamma_k^t) \|\mathbf{P}\mathbf{x}_0\|_2 + \gamma_{k+1}^t \|(\mathbf{I} - \mathbf{P}) \mathbf{x}_0\|_2 \\ &\leq (1 - \gamma_k^t) \|\mathbf{P}\mathbf{x}_0\|_2 + \gamma_{k+1}^t \|\mathbf{x}_0\|_2 \end{aligned}$$

37 where we used the fact that  $1 \geq \gamma_1 \geq \dots \geq \gamma_n$ . Now, we have

$$\begin{aligned} \gamma_k^t &\geq (1 - c_2 \epsilon \log(24n/\epsilon^2 k)^{-1})^{c_3 \log(24n/\epsilon^2 k)} \\ &\geq 1 - c_2 c_3 \epsilon \\ &= 1 - \frac{\epsilon}{2\sqrt{6}}. \end{aligned}$$

38 Furthermore,

$$\begin{aligned}
\gamma_{k+1}^t &\leq c_1^{c_3 \log(24n/\epsilon^2 k)} \\
&= \left(\frac{1}{c_1}\right)^{c_3 \log(\epsilon^2 k/24n)} \\
&= \left(\frac{\epsilon^2 k}{24n}\right)^{c_3 \log(1/c_1)} \\
&= \epsilon \sqrt{\frac{k}{24n}}.
\end{aligned}$$

39 Combining everything together, we have

$$\begin{aligned}
\|\mathbf{y}_i - \mathbf{P}\mathbf{x}_0\|_2 &\leq \frac{\epsilon}{2\sqrt{6}} \|\mathbf{P}\mathbf{x}_0\|_2 + \epsilon \sqrt{\frac{k}{24n}} \|\mathbf{x}_0\|_2 \\
&\leq \frac{\epsilon}{2\sqrt{6}} \sqrt{6k} + \epsilon \sqrt{\frac{6kn}{24n}} \\
&\leq \epsilon \sqrt{k},
\end{aligned}$$

40 which completes the proof. ■

41 It remains to prove that the  $k$ -means cost is preserved in the embedding produced by the power method.  
42 Recall that  $\mathbf{f}_1, \dots, \mathbf{f}_k$  are the eigenvectors of  $\mathbf{M}$  corresponding to the eigenvalues  $\gamma_1, \dots, \gamma_k$  and  
43  $\mathbf{y}_1, \dots, \mathbf{y}_l$  are the vectors computed in Algorithm 2. We will also consider the vectors  $\mathbf{z}_1, \dots, \mathbf{z}_l$  given  
44 by  $\mathbf{z}_i = \mathbf{P}\mathbf{x}_i$ , where  $\{\mathbf{x}_i\}_{i=1}^k$  are the random vectors sampled in Algorithm 2, and  $\mathbf{P} = \sum_{i=1}^k \mathbf{f}_i \mathbf{f}_i^\top$   
45 is the projection onto the space spanned by  $\mathbf{f}_1, \dots, \mathbf{f}_k$ . We also define

$$\mathbf{F} = \begin{bmatrix} | & & | \\ \mathbf{f}_1 & \dots & \mathbf{f}_k \\ | & & | \end{bmatrix}, \quad \mathbf{Y} = \begin{bmatrix} | & & | \\ \mathbf{y}_1 & \dots & \mathbf{y}_l \\ | & & | \end{bmatrix} \quad \text{and} \quad \mathbf{Z} = \begin{bmatrix} | & & | \\ \mathbf{z}_1 & \dots & \mathbf{z}_l \\ | & & | \end{bmatrix}.$$

46 We will use the following result shown by Makarychev et al. [22].

47 **Lemma 3.2** ([22], Theorem 1.3). *Given data  $\mathbf{X} \in \mathbb{R}^{n \times k}$ , let  $\mathbf{\Pi} \in \mathbb{R}^{k \times l}$  be a random matrix with*  
48 *each column sampled from the  $k$ -dimensional Gaussian distribution  $\mathcal{N}(\mathbf{0}, \mathbf{I}_k)$  and*

$$l = O\left(\frac{\log(k) + \log(1/\epsilon)}{\epsilon^2}\right).$$

49 *Then, with probability at least  $1 - \epsilon$ , it holds for all partitions  $\{A_i\}_{i=1}^k$  of  $[n]$  that*

$$\text{COST}_{\mathbf{X}}(A_1, \dots, A_k) \in (1 \pm \epsilon) \text{COST}_{\mathbf{X}\mathbf{\Pi}}(A_1, \dots, A_k).$$

50 Applying this lemma with  $\mathbf{X} = \mathbf{D}^{-\frac{1}{2}}\mathbf{F}$  and  $\mathbf{\Pi} = \mathbf{F}^\top \mathbf{Z}$  shows that the  $k$ -means cost is approximately  
51 equal in the embeddings given by  $\mathbf{D}^{-\frac{1}{2}}\mathbf{F}$  and  $\mathbf{D}^{-\frac{1}{2}}\mathbf{Z}$ , since  $\mathbf{F}\mathbf{F}^\top \mathbf{Z} = \mathbf{Z}$  and each of the entries of  
52  $\mathbf{F}^\top \mathbf{Z}$  is distributed according to the Gaussian distribution  $\mathcal{N}(0, 1)$ . By Lemma 3.1, we can also show  
53 that the  $k$ -means objective in  $\mathbf{D}^{-\frac{1}{2}}\mathbf{Y}$  is within an additive error of  $\mathbf{D}^{-\frac{1}{2}}\mathbf{Z}$ . This allows us to prove  
54 the following lemma.

55 **Lemma 3.3.** *With probability at least  $0.9 - \epsilon$ , for any partitioning  $\{A_i\}_{i=1}^k$  of the vertex set  $V$ , we*  
56 *have*

$$\text{COST}_{\mathbf{D}^{-1/2}\mathbf{Y}}(A_1, \dots, A_k) \geq (1 - \epsilon) \text{COST}_{\mathbf{D}^{-1/2}\mathbf{F}}(A_1, \dots, A_k) - \epsilon k$$

57 and

$$\text{COST}_{\mathbf{D}^{-1/2}\mathbf{Y}}(A_1, \dots, A_k) \leq (1 + \epsilon) \text{COST}_{\mathbf{D}^{-1/2}\mathbf{F}}(A_1, \dots, A_k) + \epsilon k.$$

58 In order to prove this, we will use the fact shown by Boutsidis and Magdon-Ismael [5] that we can  
59 write the  $k$ -means cost as

$$\text{COST}_{\mathbf{B}}(A_i, \dots, A_k) = \|\mathbf{B} - \mathbf{X}\mathbf{X}^\top \mathbf{B}\|_F^2 \tag{1}$$

60 where  $\mathbf{X} \in \mathbb{R}^{n \times k}$  is the indicator matrix of the partition, defined by

$$\mathbf{X}(u, i) = \begin{cases} \frac{1}{\sqrt{|A_i|}} & \text{if } u \in A_i \\ 0 & \text{otherwise} \end{cases},$$

61 and  $\|\mathbf{B}\|_F \triangleq (\sum_{i,j} \mathbf{B}_{i,j}^2)^{1/2}$  is the Frobenius norm.

62 *Proof of Lemma 3.3.* Notice that  $\mathbf{F}^\top \mathbf{Z} \in \mathbb{R}^{k \times l}$  is a random matrix with columns drawn from the  
 63 standard  $k$ -dimensional Gaussian distribution. Then, by Lemma 3.2, with probability at least  $1 - \epsilon$ ,  
 64 we have for any partition  $\{A_i\}_{i=1}^k$  that

$$\text{COST}_{\mathbf{D}^{-1/2}\mathbf{F}}(A_1, \dots, A_k) \in (1 \pm \epsilon) \text{COST}_{\mathbf{D}^{-1/2}\mathbf{Z}}(A_1, \dots, A_k) \quad (2)$$

65 since  $\mathbf{D}^{-1/2}\mathbf{F}\mathbf{F}^\top \mathbf{Z} = \mathbf{D}^{-1/2}\mathbf{Z}$ , where we use the fact that the columns of  $\mathbf{Z}$  are in the span of  
 66  $\mathbf{f}_1, \dots, \mathbf{f}_k$ .

67 Furthermore, by the union bound, we can assume with probability at least 0.9 that the conclusion of  
 68 Lemma 3.1 holds for every vector  $\mathbf{y}_i$  computed by Algorithm 2.

69 Now, we will establish that  $\text{COST}_{\mathbf{D}^{-1/2}\mathbf{Y}}(\cdot)$  is close to  $\text{COST}_{\mathbf{D}^{-1/2}\mathbf{Z}}(\cdot)$  which will complete the  
 70 proof. For some arbitrary partition  $\{A_i\}_{i=1}^k$ , let  $\mathbf{X}$  be the indicator matrix of the partition. Then, we  
 71 have

$$\begin{aligned} & \left\| \mathbf{D}^{-1/2}\mathbf{Y} - \mathbf{X}\mathbf{X}^\top \mathbf{D}^{-1/2}\mathbf{Y} \right\|_F - \left\| \mathbf{D}^{-1/2}\mathbf{Z} - \mathbf{X}\mathbf{X}^\top \mathbf{D}^{-1/2}\mathbf{Z} \right\|_F \\ &= \left\| (\mathbf{I} - \mathbf{X}\mathbf{X}^\top) \mathbf{D}^{-1/2}\mathbf{Y} \right\|_F - \left\| (\mathbf{I} - \mathbf{X}\mathbf{X}^\top) \mathbf{D}^{-1/2}\mathbf{Z} \right\|_F \\ &\leq \left\| (\mathbf{I} - \mathbf{X}\mathbf{X}^\top) \mathbf{D}^{-1/2} (\mathbf{Y} - \mathbf{Z}) \right\|_F \\ &\leq \|(\mathbf{I} - \mathbf{X}\mathbf{X}^\top) (\mathbf{Y} - \mathbf{Z})\|_F \\ &\leq \|\mathbf{Y} - \mathbf{Z}\|_F \\ &= \sqrt{\sum_{i=1}^l \|\mathbf{y}_i - \mathbf{z}_i\|_2^2} \\ &\leq \sqrt{l\epsilon^2 k} \\ &\leq \epsilon k, \end{aligned}$$

72 Where we use Lemma 3.1, and the fact that  $l \leq k$ . Combining this with (2) completes the proof. ■

73 Now we come to the proof of the main theorem.

74 **Theorem 3.1.** Let  $G$  be a graph with  $\lambda_{k+1} = \Omega(1)$  and  $\rho(k) = O(\epsilon \cdot \log(n/\epsilon)^{-1})$ . Additionally, let  
 75  $\{S_i\}_{i=1}^k$  be the  $k$ -way partition corresponding to  $\rho(k)$  and suppose that  $\{S_i\}_{i=1}^k$  are almost balanced.  
 76 Let  $\{A_i\}_{i=1}^k$  be the output of Algorithm 2. With probability at least  $0.9 - \epsilon$ , there exists a permutation  
 77  $\sigma : [k] \rightarrow [k]$  such that

$$\sum_{i=1}^k \text{vol}(A_i \triangle S_{\sigma(i)}) = O(\epsilon \cdot \text{vol}(V_G)).$$

78 Moreover, the running time of Algorithm 2 is

$$\tilde{O}(m \cdot \epsilon^{-2}) + T_{\text{KM}}(n, k, l),$$

79 where  $m$  is the number of edges in  $G$  and  $T_{\text{KM}}(n, k, l)$  is the running time of the  $k$ -means approxi-  
 80 mation algorithm on  $n$  points in  $l$  dimensions.

81 To complete the proof, we will make use of the following results proved by Macgregor and Sun [21],  
 82 which hold under the same assumptions as Theorem 3.1.

83 **Lemma 3.4** ([21], Lemma 4.1). There exists a partition  $\{A_i\}_{i=1}^k$  of the vertex set  $V$  such that

$$\text{COST}_{\mathbf{D}^{-1/2}\mathbf{F}}(A_1, \dots, A_k) < \epsilon \cdot k.$$

84 **Lemma 3.5** ([21], Theorem 2). *Given some partition of the vertices,  $\{A_i\}_{i=1}^k$ , such that*

$$\text{COST}_{\mathbf{D}^{-1/2}\mathbf{F}}(A_1, \dots, A_k) \leq ck,$$

85 *then there exists a permutation  $\sigma : [k] \rightarrow [k]$  such that*

$$\sum_{i=1}^k \text{vol}(A_i \triangle S_{\sigma(i)}) = O(c \cdot \text{vol}(V)).$$

86 *Proof of Theorem 3.1.* By Lemma 3.4 and Lemma 3.3, with probability at least  $0.9 - \epsilon$ , there exists  
 87 some partition  $\{\hat{A}_i\}_{i=1}^k$  of the vertex set  $V_G$  such that  $\text{COST}_{\mathbf{D}^{-1/2}\mathbf{Y}}(\hat{A}_1, \dots, \hat{A}_k) \leq (1+\epsilon)\epsilon k + \epsilon k \leq$   
 88  $3k\epsilon$ . Since we use a constant-factor approximation algorithm for  $k$ -means, the partition  $\{A_i\}_{i=1}^k$   
 89 returned by Algorithm 2 satisfies  $\text{COST}_{\mathbf{D}^{-1/2}\mathbf{Y}}(A_1, \dots, A_k) = O(\epsilon k)$ . Then, by Lemma 3.5, for  
 90 some permutation  $\sigma : [k] \rightarrow [k]$ , we have

$$\sum_{i=1}^k \text{vol}(A_i \triangle S_{\sigma(i)}) = O(\epsilon \cdot \text{vol}(V_G)).$$

91 To bound the running time, notice that the number of non-zero entries in  $\mathbf{M}$  is  $2m$ , and the time  
 92 complexity of matrix multiplication is proportional to the number of non-zero entries. Therefore,  
 93 the running time of  $\text{POWERMETHOD}(\mathbf{M}, \mathbf{x}_0, t)$  is  $\tilde{O}(m)$ . Since the loop in Algorithm 2 is executed  
 94  $\Theta(\log(k) \cdot \epsilon^{-2})$  times, the total running time of Algorithm 2 is  $\tilde{O}(m \cdot \epsilon^{-2}) + T_{\text{KM}}(n, k, l)$ . ■
